# Supplementary material
Source: PubMed Central journal article supplement (PMC34705)
Supplement: pnas_131057498_1.pdf [file pnas_131057498_1.pdf]

Table 1. Functional classification of the genes detected in *Wigglesworthia pallidipes* by array analysis

|                                               |          |                                                              |       |                                  |              |
|-----------------------------------------------|----------|--------------------------------------------------------------|-------|----------------------------------|--------------|
| <b>Cellular Processes</b>                     |          | <b>Nucleotide biosynthesis and metabolism</b>                | b3993 | thiE                             |              |
| b0014                                         | dnaK     |                                                              | b3994 | thiC                             |              |
| b0015                                         | dnaJ     | b0032                                                        |       |                                  |              |
| b0018                                         | gefL     | b0033                                                        |       | <b>Cell structure</b>            |              |
| b0089                                         | ftsW     | b0049                                                        |       | b0087                            | mraY         |
| b0094                                         | ftsA     | b0104                                                        |       | b0090                            | murG         |
| b0095                                         | ftsZ     | b0474                                                        |       | b0091                            | murC (B,E,I) |
| b0141                                         | yadN     | b0523                                                        |       | b0179                            | lpxD (K)     |
| b0188                                         | mesJ     | b0888                                                        |       | b0182                            | lpxB         |
| b0229                                         | fhiA     | b1098                                                        |       | b0634                            | mrdB         |
| b0230                                         | mbhA     | b1131                                                        |       | b0635                            | mrDA         |
| b0433                                         | ampG     | b1849                                                        |       | b1215                            | kdsA (B)     |
| b0479                                         | fsr      | b2065                                                        |       | b1879                            | flhA         |
| b0623                                         | cspE     | b2234                                                        |       | b1891                            | flhC         |
| b0990                                         | cspG     | b2312                                                        |       | b1922                            | fliA         |
| b1076                                         | flgE     | b2498                                                        |       | b1924                            | fliD         |
| b1078                                         | flgG     | b2508                                                        |       | b1948                            | fliP         |
| b1175                                         | minD     | b2557                                                        |       | b2218                            | rCS          |
| b1557                                         | cspB     |                                                              |       | b2435                            | amiA         |
| b1823                                         | cspC     | <b>Transcription, RNA processing/degradation</b>             |       | b2519                            | pbpC         |
| b1889                                         | motB     | b0148                                                        |       | b2817                            | amiC         |
| b3178                                         | hflB     | b2370                                                        |       | b3182                            | dacB         |
| b3266                                         | acrF     | b3067                                                        |       | b3189                            | murA         |
| b3638                                         | radC     | b3162                                                        |       | b3224                            | nanT         |
| b3673                                         | emrD     | b3164                                                        |       | b3251                            | mreB         |
| b3931                                         | hslU     | b3169                                                        |       | b3428                            | glgP         |
| b3932                                         | hslV     | b3295                                                        |       | b3429                            | glgA         |
| b4142                                         | mopB     | b3461                                                        |       | b3624                            | rfaZ         |
| b4143                                         | mopA     | b3780                                                        |       | b3793                            | rffT         |
|                                               |          | b3783                                                        |       | b3842                            | rfaH         |
| <b>Fatty acid and phospholipid metabolism</b> |          | b3982                                                        |       | b4317                            | fimD         |
| b0180                                         | fabZ     | b3987                                                        |       |                                  |              |
| b0185                                         | accA     | b3988                                                        |       | <b>Regulatory function</b>       |              |
| b0954                                         | fabA     |                                                              |       | b0439                            | lon          |
| b1094                                         | acpP     | <b>Biosynthesis of cofactors, prosthetic groups/carriers</b> |       | b1608                            | rstA         |
| b1249                                         | cls      | b0068                                                        |       | b3105                            | yhaJ         |
| b2316                                         | accD     | b0154                                                        |       | b3779                            | gppA         |
| b2323                                         | fabB     | b0415                                                        |       | b3791                            | yifI         |
| b2828                                         | lgt      | b0421                                                        |       | b3912                            | cpXR         |
| b3256                                         | accC     | b0475                                                        |       |                                  |              |
| b4041                                         | plsB (C) | b0529                                                        |       | <b>Replication/recombination</b> |              |
|                                               |          | b0596                                                        |       | <b>DNA modification/repair</b>   |              |
| <b>Carbon compound metabolism</b>             |          | b0628                                                        |       | b0214                            | rnhA         |
| b0064                                         | araC     | b0630                                                        |       | b0470                            | dnaX         |
| b2297                                         | pta      | b0750                                                        |       | b0640                            | holA         |
| b2458                                         | eutI     | b0774                                                        |       | b0708                            | phrB         |
| b2799                                         | fucO     | b0775                                                        |       | b0892                            | ycaJ         |
| b2714                                         | ascG     | b0776                                                        |       | b1084                            | rne          |
| b2805                                         | fucR     | b2315                                                        |       | b1235                            | hnr          |
| b2901                                         | bglA     | b2436                                                        |       | b1237                            | hns          |
| b2980                                         | glcC     | b2574                                                        |       | b1286                            | rnb          |
| b3032                                         | icc      | b2688                                                        |       | b1961                            | dcm          |
| b3127                                         | yhaU     | b2947                                                        |       | b2184                            | yejH         |
| b3417                                         | malP     | b3447                                                        |       | b2699                            | recA         |
| b3950                                         | frwB     | b3991                                                        |       | b3652                            | recG         |
| b4323                                         | uxuB     |                                                              |       | b3701                            | dnaN         |
|                                               |          |                                                              |       | b3702                            | dnaA         |

|                                               |      |                          |             |                                                        |          |      |
|-----------------------------------------------|------|--------------------------|-------------|--------------------------------------------------------|----------|------|
| b3741                                         | gidA | b3772                    | ilvA        | b3732                                                  | atpD     |      |
| b3822                                         | recQ | b3773                    | ilvY        | b3733                                                  | atpG     |      |
| b3813                                         | uvrD | b3774                    | ilvC        | b3734                                                  | atpA     |      |
| <b>Central intermediary metabolism</b>        |      |                          | b3809       | b3737                                                  | atpE     |      |
| b0121                                         | speE | b3828                    | metR        | b3739                                                  | atpI     |      |
| b0268                                         | yagE | b3829                    | metE        | b3844                                                  | ubiB (G) |      |
| b0451                                         | amtB | b3868                    | glnG        | b3895                                                  | fdhD     |      |
| b0480                                         | ushA | b3869                    | glnL        | b3916                                                  | pfkA     |      |
| b0718                                         | ybgQ | b3870                    | glnA        | b3919                                                  | tpiA     |      |
| b1702                                         | ppsA | b3939                    | metB        | b4025                                                  | pgi      |      |
| b2521                                         | sseA | b3940                    | metL        | b4073                                                  | nrfD     |      |
| b2484                                         | hyfD | b3957                    | argE        | b4074                                                  | nrfE     |      |
| b2538                                         | digA | b3958                    | argC        | <b>Translation and post-translational modification</b> |          |      |
| b2675                                         | nrdE | b3959                    | argB        | b0023                                                  | rpsT     |      |
| b2676                                         | nrdF | b3960                    | argH        | b0026                                                  | ileS     |      |
| b2751                                         | cysN | b4024                    | lysC        | b0168                                                  | map      |      |
| b2764                                         | cysJ | b4054                    | tyrB        | b0194                                                  | proS     |      |
| b2765                                         | ygcM | b4117                    | adi         | b0438                                                  | clpX     |      |
| b2780                                         | pyrG | b4131                    | cadA        | b0441                                                  | ppiD     |      |
| b2808                                         | gcvA | b4133                    | cadC        | b0526                                                  | cysS     |      |
| b2927                                         | epd  | <b>Energy Metabolism</b> |             |                                                        | b0642    | leuS |
| b2938                                         | speA | b0114                    | aceE        | b0884                                                  | infA     |      |
| b2937                                         | speB | b0115                    | aceF        | b0893                                                  | serS     |      |
| b3136                                         | agaS | b0116                    | lpdA        | b0911                                                  | rpsA     |      |
| b3176                                         | mrsA | b0428                    | cyoE        | b0930                                                  | asnS     |      |
| b3213                                         | gltD | b0431                    | cyoB        | b1089                                                  | rpmF     |      |
| b3403                                         | pckA | b0720                    | gltA        | b1211                                                  | prfA     |      |
| b3617                                         | kbl  | b0721                    | dhsC (sdhC) | b1538                                                  | dcp      |      |
| b4099                                         | phnI | b0723                    | dhsA (sdhA) | b1637                                                  | tyrS     |      |
| b4095                                         | phnM | b0724                    | dhsB (sdhB) | b1713                                                  | pheT     |      |
| <b>Amino acid biosynthesis and metabolism</b> |      |                          | b0726       | b1719                                                  | thrS     |      |
| b0269                                         | yagF | b0726                    | sucA        | b1766                                                  | sppA     |      |
| b0273                                         | argF | b0759                    | galE        | b1830                                                  | prc      |      |
| b0674                                         | asnB | b0903                    | pflB        | b2114                                                  | metG     |      |
| b2329                                         | aroC | b0997                    | torA        | b2190                                                  | yeyO     |      |
| b2551                                         | glyA | b1109                    | ndh         | b2318                                                  | truA     |      |
| b2600                                         | tyrA | b1300                    | aldH        | b2400                                                  | gltX     |      |
| b2601                                         | aroF | b1474                    | fdnG        | b2514                                                  | hisS     |      |
| b2797                                         | sdaB | b1587                    | ydfN        | b2569                                                  | lepA     |      |
| b2838                                         | lysA | b1588                    | ynfF        | b2592                                                  | clpB     |      |
| b2839                                         | lysR | b1611                    | fumC        | b2697                                                  | alaS     |      |
| b2913                                         | serA | b1676                    | pykF        | b2890                                                  | lysS     |      |
| b2957                                         | ansB | b1852                    | zwf         | b2891                                                  | prfB     |      |
| b3172                                         | argG | b1854                    | pykA        | b3020                                                  | ygiS     |      |
| b3359                                         | argD | b2277                    | nuoM        | b3129                                                  | sohA     |      |
| b3389                                         | aroB | b2465                    | tktB        | b3165                                                  | rpsO     |      |
| b3390                                         | aroK | b2469                    | narQ        | b3168                                                  | infB     |      |
| b3433                                         | asd  | b2482                    | yffF        | b3185                                                  | rpmA     |      |
| b3572                                         | avtA | b2779                    | eno         | b3186                                                  | rplU     |      |
| b3607                                         | cysE | b2914                    | rpiA        | b3230                                                  | rpsI     |      |
| b3616                                         | tdh  | b2935                    | tktA        | b3231                                                  | rplM     |      |
| b3744                                         | asnA | b2994                    | hybC        | b3234                                                  | hhoA     |      |
| b3770                                         | ilvE | b2995                    | hybB        | b3235                                                  | hhoB     |      |
| b3771                                         | ilvD | b3062                    | ttdB        | b3294                                                  | rplQ     |      |
|                                               |      | b3132                    | agaZ        | b3296                                                  | rpsD     |      |
|                                               |      | b3425                    | glpE        | b3297                                                  | rpsK     |      |
|                                               |      | b3605                    | lctD        |                                                        |          |      |
|                                               |      | b3608                    | gpsA        |                                                        |          |      |

|                         |          |       |      |                         |            |
|-------------------------|----------|-------|------|-------------------------|------------|
| b3301                   | rplO     | b0576 | pheP | b3599                   | mtIA       |
| b3302                   | rpmD     | b0581 | ybdA | b3660                   | yicL       |
| b3303                   | rpsE     | b0590 | fepD | b3667                   | uhpC       |
| b3304                   | rplR     | b0657 | Int  | b3668                   | uhpB       |
| b3305                   | rplF     | b0660 | ybeZ | b3679                   | yidK       |
| b3306                   | rpsH     | b0679 | nagE | b3685                   | yidE       |
| b3307                   | rpsN     | b0698 | kdpA | b3816                   | corA       |
| b3310                   | rplN     | b0715 | ybgN | b3849                   | trkH       |
| b3313                   | rplP     | b0794 | ybhF | b3876                   | yihO       |
| b3314                   | rpsC     | b0810 | glnP | b3877                   | yihP       |
| b3315                   | rplV     | b0820 | ybiT | b3909                   | kdgT       |
| b3316                   | rpsS     | b0831 | yliC | b3947                   | ptsA       |
| b3317                   | rplB     | b0855 | potG | b3981                   | secE       |
| b3319                   | rplD     | b0856 | potH | b4033                   | malF       |
| b3320                   | rplC     | b0857 | PotI | b4035                   | malK       |
| b3321                   | rpsJ     | b0860 | artJ | b4104                   | phnE       |
| b3339                   | tufA     | b0914 | msbA | b4106                   | phnC       |
| b3340                   | fusA     | b1015 | putP | b4111                   | proP       |
| b3341                   | rpsG     | b1123 | potD | b4141                   | yjeH       |
| b3342                   | rpsL     | b1124 | potC | b4156                   | yjeM       |
| b3384                   | trpS     | b1125 | potB | b4227                   | ytfQ       |
| b3498                   | prlC     | b1223 | narK | b4289                   | fecC       |
| b3559                   | glyS     | b1243 | oppA |                         |            |
| b3560                   | glyQ     | b1250 | kch  |                         |            |
| b3590                   | selB     | b1294 | sapA | <b>Putative enzymes</b> |            |
| b3591                   | selA     | b1318 | ycjV | b0129                   | yadI       |
| b3636                   | rpmG     | b1323 | tyrR | b0323                   | yahl       |
| b3637                   | rpmB     | b1451 | yncD | b0420                   | yajP (dxs) |
| b3703                   | rpmH     | b1487 | ddpA | b0493                   | ybbO       |
| b3775                   | ppiC (D) | b1711 | btuC | b0496                   | ybbP       |
| b3847                   | pepQ     | b1737 | celB | b0518                   | fdrA       |
| b3860                   | dsbA     | b2148 | mglC | b0615                   | citF       |
| b3871                   | yihK     | b2156 | lysP | b0616                   | citE       |
| b3980                   | tufB     | b2180 | yejF | b0618                   | citC       |
| b3983                   | rplK     | b2211 | yojI | b1378                   | ydbK       |
| b4174                   | hflK     | b2306 | hisP | b2254                   | pmrF       |
| b4258                   | valS     | b2310 | argT | b2255                   | yfbG       |
| b4260                   | pepA     | b2546 | yphD | b2263                   | yfbB       |
| b4375                   | prfC     | b2610 | ffh  | b2269                   | elaD       |
|                         |          | b2882 | ygfO | b2290                   | yfbQ       |
|                         |          | b2975 | yghK | b2293                   | yfbT       |
| <b>Transport and</b>    |          | b3089 | ygjU | b2304                   | yfcH       |
| <b>binding proteins</b> |          | b3175 | secG | b2324                   | yfcK       |
| b0047                   | kefC (A) | b3201 | yhbG | b2330                   | yfcB       |
| b0098                   | secA     | b3268 | yhdW | b2373                   | yfdU       |
| b0127                   | yadG     | b3290 | trkA | b2410                   | yfeH       |
| b0153                   | fhuB     | b3300 | prlA | b2511                   | yfgK       |
| b0155                   | yadQ     | b3350 | kefB | b2517                   | yfgB       |
| b0173                   | yaeM     | b3364 | yhfC | b2534                   | yfhR       |
| b0199                   | abc      | b3370 | yhfM | b2541                   | yfhX       |
| b0314                   | betT     | b3436 | gntU | b2545                   | yphC       |
| b0336                   | codB     | b3450 | ugpC | b2710                   | ygaK       |
| b0353                   | mhpT     | b3457 | livH | b2711                   | ygbD       |
| b0367                   | tauC     | b3523 | yhjE | b2736                   | ygbJ       |
| b0408                   | secD     | b3539 | yhjV | b2738                   | ygbL       |
| b0409                   | secF     | b3542 | dppC | b2774                   | ygcW       |
| b0448                   | mdIA     | b3552 | yiaD | b2776                   | ygcE       |
| b0449                   | mdIB     | b3567 | xyIG | b2867                   | ygeT       |
| b0575                   | ybdE     |       |      | b2869                   | ygeV       |

|       |          |       |      |       |      |
|-------|----------|-------|------|-------|------|
| b2871 | ygeX     | b0671 | o50  | b2515 | gcpE |
| b2874 | yqeA     | b0681 | ybfM | b2653 | f57  |
| b2875 | yqeB     | b0717 | ybgP | b2666 | yqaE |
| b2881 | ygfN     | b0792 | ybhR | b2866 | ygeS |
| b2885 | o276     | b0807 | ybiN | b2928 | yggC |
| b2887 | ygfT     | b0818 | ybiR | b2948 | yqgE |
| b2899 | yqfA     | b0835 | yliG | b3071 | yqjI |
| b2974 | f675     | b1133 | ycfB | b3080 | ygjK |
| b2978 | GlcE (F) | b1191 | ycgO | b3082 | ygjM |
| b2997 | yghV     | b1268 | yciQ | b3087 | ygjR |
| b3011 | yqhD     | b1269 | yciL | b3232 | yhcm |
| b3052 | rfaE     | b1407 | ydbD | b3407 | yhgF |
| b3073 | ygiG     | b1410 | ybcC | b3492 | yhiN |
| b3078 | ygiJ     | b1494 | yddC | b3499 | yhiR |
| b3081 | ygiL     | b1545 | ydfL | b3533 | yhjO |
| b3102 | yqiG     | b1552 | cspl | b3587 | yiaW |
| b3125 | yhaE     | b1639 | ydhA | b3606 | yibK |
| b3173 | yhbX     | b1642 | slyA | b3611 | yibN |
| b3197 | yrbH     | b1649 | ydhM | b3612 | yibO |
| b3253 | yhdH     | b1668 | ydhS | b3659 | yicK |
| b3338 | yheB     | b1683 | sufB | b3664 | yicO |
| b3398 | yrfF     | b1687 | ydiJ | b3665 | yicP |
| b3475 | yhhU     | b1688 | ydiK | b3677 | yidI |
| b3530 | yhjL     | b1706 | ydiU | b3689 | yidR |
| b3553 | yiaE     | b1725 | yniA | b3690 | yidS |
| b3575 | yiaK     | b1741 | ydjQ | b3693 | yidV |
| b3576 | yiaL     | b1742 | ydjR | b3746 | yieN |
| b3589 | yiaY     | b1752 | ydjZ | b3810 | yigA |
| b3792 | yifJ     | b1755 | ynjC | b3827 | yigM |

**Hypothetical**

|       |             |
|-------|-------------|
| b0069 | yabN        |
| b0174 | uppS        |
| b0176 | yaeL        |
| b0177 | yaeT        |
| b0267 | yagA        |
| b0284 | yagR        |
| b0285 | yagS        |
| b0321 | yahG        |
| b0335 | yahU        |
| b0445 | ybaE        |
| b0456 | ybaA        |
| b0457 | ylaB        |
| b0488 | ybbJ        |
| b0500 | ybbD        |
| b0514 | ybbZ        |
| b0544 | ybcK        |
| b0567 | ybcH        |
| b0597 | ybdB        |
| b0598 | ybdC        |
| b0602 | ybdN        |
| b0607 | ybdQ        |
| b0639 | nadD (ybeN) |
| b0645 | ybeR        |
| b0647 | ybeT        |
| b0659 | ybeY        |
| b0663 | o111        |
| b0669 | o39         |

|       |      |
|-------|------|
| b1769 | ydjE |
| b1784 | yeaH |
| b1785 | yeal |
| b1790 | yeaM |
| b1858 | znuC |
| b2000 | yzzX |
| b2027 | wzzB |
| b2046 | wzxC |
| b2101 | yegW |
| b2107 | yohN |
| b2109 | yehB |
| b2118 | yehI |
| b2126 | yehU |
| b2130 | yehY |
| b2207 | yojF |
| b2210 | yojH |
| b2214 | yojL |
| b2230 | yfaA |
| b2286 | nuoC |
| b2356 | yfdM |
| b2374 | yfdW |
| b2384 | ypdE |
| b2450 | yffS |
| b2451 | yffT |
| b2466 | ypfG |
| b2474 | ypfI |
| b2475 | ypfJ |
| b2494 | yfgC |
| b2503 | yfgF |

|       |      |
|-------|------|
| b3839 | yigU |
| b3843 | yigC |
| b3859 | yihE |
| b3896 | yiiG |
| b3910 | yiiM |
| b3915 | yiiP |
| b3925 | glpX |
| b4002 | yjaI |
| b4049 | yjbN |
| b4065 | yjcE |
| b4067 | yjcG |
| b4161 | yjeQ |
| b4385 | yjjJ |
| b4391 | yjjK |
| b3183 | yhbZ |

**Phage/transposon/plasmid**

|       |      |
|-------|------|
| b0257 | o141 |
| b0372 | tra5 |
| b0740 | tolB |
| b1374 | ynaD |
| b4172 | hfq  |
